# Supplementary material for: Aspergillus fumigatus Lytic Polysaccharide Monooxygenase AfLPMO9D: Biochemical Properties and Photoactivation of a Multi-Domain AA9 Enzyme
Source: MDPI journal article supplement (doi:10.3390/pr11113230), 2023-11-16
Supplement: s1 [file s1]

## Supplementary Materials

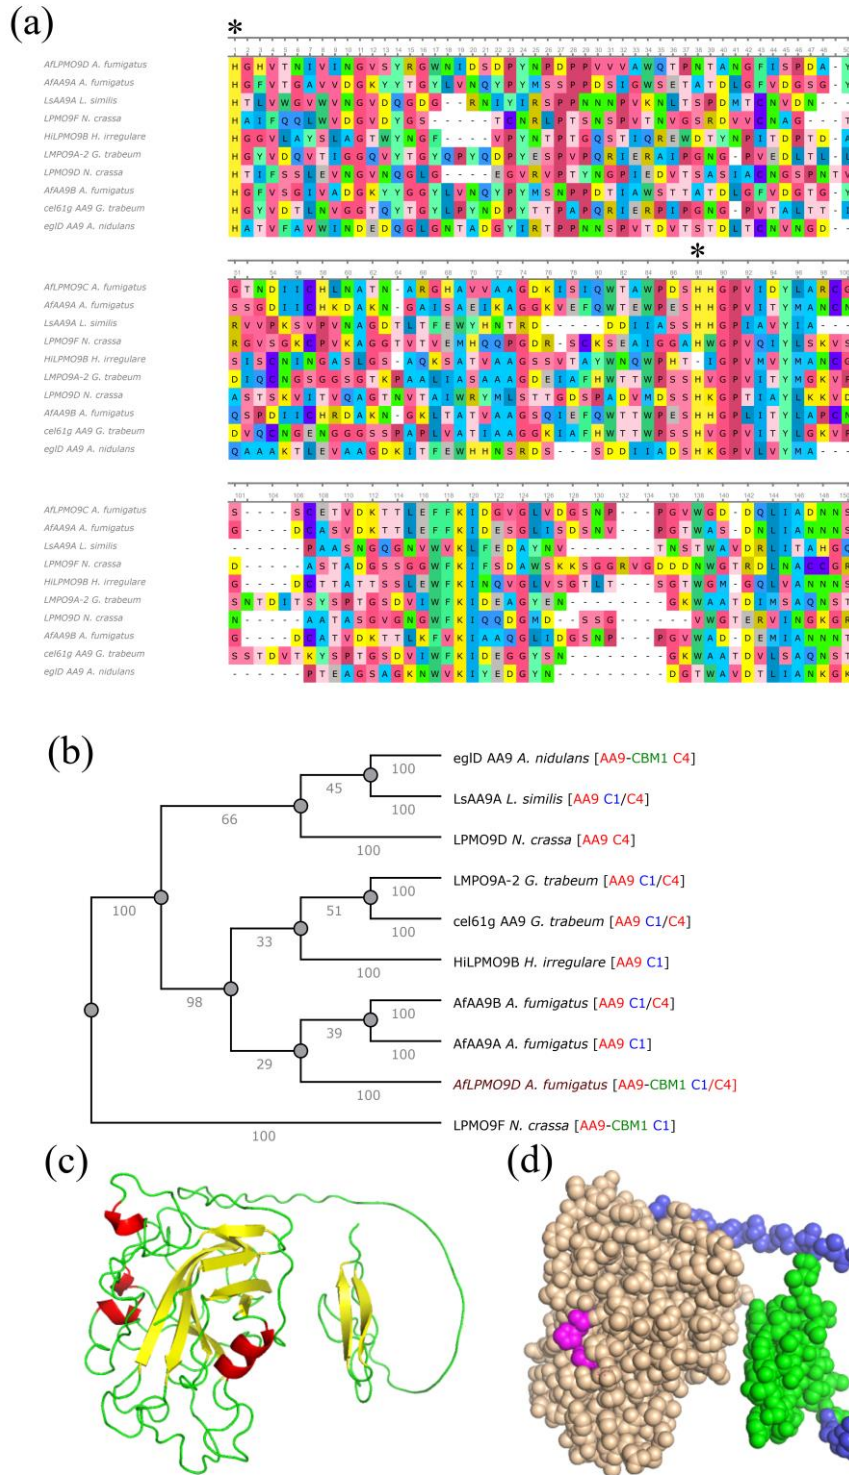

**Figure S1.** (a) ClustalW sequence alignment, and (b) protein phylogenetic three of AflPMO9D and characterized LPMOs; AfAA9A *A. fumigatus* [Genbank:KEY82006.1], AfAA9B *A. fumigatus* [Genbank:KEY76044.1], HiLPMO9B *H. irregulare* [Uniprot:W4KMP1], LPMO9A-2 *G. trabeum* [Uniprot:A0A1C9ZMC5], cel61g AA9 *G. trabeum* [Uniprot:F8T947], LPMO9F *N. crassa* [Uniprot:Q6MGH2], eglD AA9 *A. nidulans* [Uniprot:Q5BCX8], LsAA9A *L. similis* [Uniprot:A0A052GKZ1], LPMO9D *N. crassa* [Uniprot:Q1K8B6]. (c)

Cartoon representation of AfLPMO9D structure, helix (red), loop (green),  $\beta$ -sheet (yellow). (d) Sphere model of AfLPMO9D structure, CBM1 (green), CBM1 linker (blue), copper-coordinating histidines (purple).

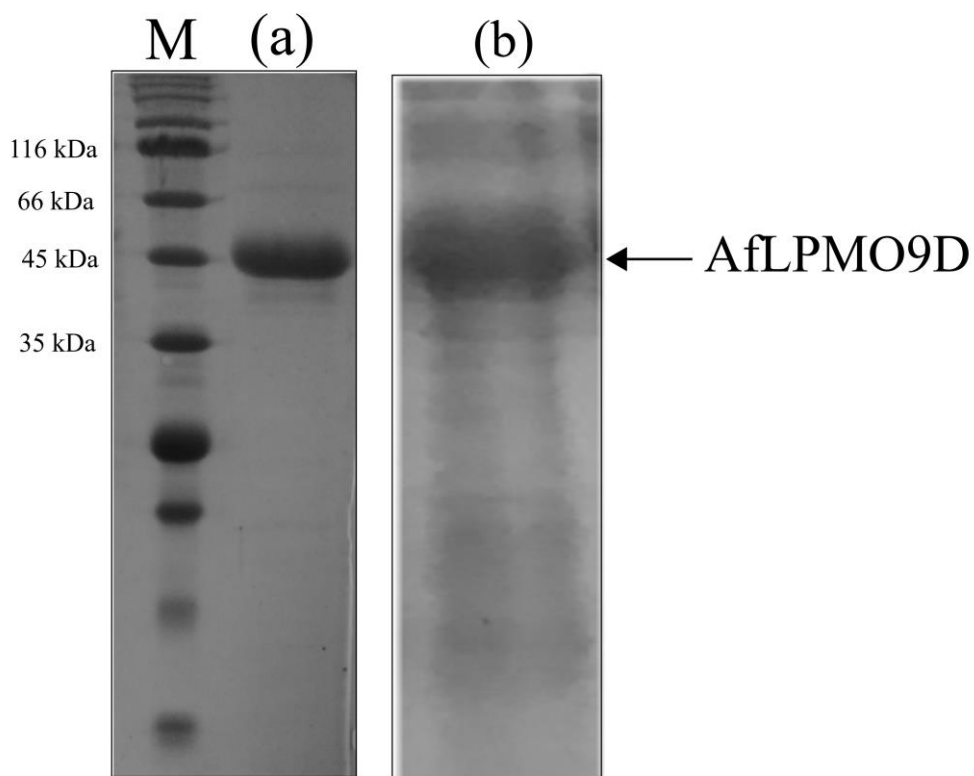

**Figure S2.** 12% SDS-PAGE of (a) purified AfLPMO9D, and (b) *A. nidulans* secretome after maltose induction showing AfLPMO9D secretion.

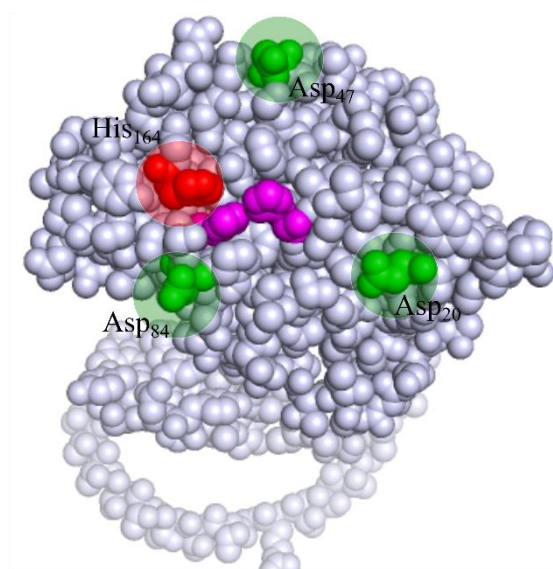

**Figure S3.** AfLPMO9D structural model showing the two copper-coordinating histidines (purple), aspartate residues (Asp<sub>47</sub>, Asp<sub>84</sub>, Asp<sub>20</sub>, green), and histidine 164 (red) close to the catalytic site.
